# Supplementary material
Source: PubMed Central journal article supplement (PMC7965912)
Supplement: 4104_tableV2.pdf [file 4104_tableV2.pdf]

**On-line Table: Quantitative and qualitative variables**

| Characteristics    | Younger than 50 (yr) | 50–59 (yr)  | 60–69 (yr)  | 70–79 (yr)  | 80 and Older (yr) | Mean (Range)  | Overall         |
|--------------------|----------------------|-------------|-------------|-------------|-------------------|---------------|-----------------|
| No.                | 12.12% (20)          | 13.94% (23) | 21.21% (35) | 35.15% (58) | 17.58% (29)       | 67.4 (29–90)  | 165             |
| Sex                |                      |             |             |             |                   |               |                 |
| Male               | 45% (9)              | 52% (12)    | 63% (22)    | 57% (33)    | 38% (11)          |               | 52.73% (87/165) |
| Female             | 55% (11)             | 48% (11)    | 27% (13)    | 43% (25)    | 62% (18)          |               | 47.27% (78/165) |
| NIHSS              | 16.39                | 15.24       | 16.54       | 17.84       | 18.83             | 17.24 (3–27)  | 161             |
| MRI                |                      |             |             |             |                   |               |                 |
| ASPECTS            | 6.39                 | 6.27        | 5.77        | 6.43        | 7.25              | 6.4 (0–10)    | 159             |
| T2*+               | 5% (1)               | 0           | 0           | 0           | 0                 |               | 1% (1)          |
| FLAIR+             | 41% (7)              | 50% (11)    | 44% (14)    | 30% (15)    | 30% (8)           |               | 37.41% (55/147) |
| T2+                | 7% (1)               | 21% (4)     | 10% (3)     | 4% (2)      | 8% (2)            |               | 9.09% (12/132)  |
| Localization       |                      |             |             |             |                   |               |                 |
| ICA-T              | 5% (1)               | 13% (3)     | 9% (3)      | 9% (5)      | 14% (4)           |               | 9.7% (16/165)   |
| Tandem             | 25% (5)              | 35% (8)     | 31% (11)    | 29% (17)    | 28% (8)           |               | 29.7% (49/165)  |
| MIP                | 45% (9)              | 35% (8)     | 24% (12)    | 40% (23)    | 24% (7)           |               | 35.76% (59/165) |
| MID                | 10% (2)              | 4% (2)      | 6% (2)      | 15% (9)     | 24% (7)           |               | 13.33% (22/165) |
| MI-M2              | 10% (2)              | 0           | 14% (5)     | 5% (3)      | 7% (2)            |               | 7.27% (12/159)  |
| M2                 | 5% (1)               | 9% (2)      | 6% (2)      | 2% (1)      | 3% (1)            |               | 4.24% (7/165)   |
| Procedure          |                      |             |             |             |                   |               |                 |
| Combined           | 65% (13)             | 70% (16)    | 66% (23)    | 72% (42)    | 55% (16)          |               | 66.7% (110/165) |
| Stand-alone        | 35% (7)              | 30% (7)     | 24% (12)    | 28% (16)    | 45% (13)          |               | 33.3% (55/165)  |
| TICI 0/1/2a        | 21% (4)              | 17% (4)     | 11% (4)     | 23% (13)    | 24% (7)           |               | 20% (33/164)    |
| TICI 2b/3          | 79% (15)             | 83% (19)    | 89% (31)    | 77% (44)    | 76% (22)          |               | 80% (131/164)   |
| Time (min)         | 320                  | 329         | 272         | 323         | 320               | 311 (153–574) | 124             |
| Passes             | 2                    | 1.7         | 1.9         | 2.2         | 1.9               | 1.99 (0–5)    | 164             |
| Complications      | 11% (3)              | 22% (6)     | 22% (6)     | 26% (7)     | 19% (5)           |               | 16.46% (27/164) |
| Initial CT         |                      |             |             |             |                   |               |                 |
| BBBD               | 71% (12)             | 50% (11)    | 69% (20)    | 69% (35)    | 31% (9)           |               | 62.59% (87)     |
| Hemorrhage         | 18% (3)              | 9% (2)      | 7% (2)      | 8% (4)      | 5% (1)            |               | 8.7% (12/138)   |
| CT/MRI 24 hr       |                      |             |             |             |                   |               |                 |
| Hemorrhage         | 22% (4)              | 29% (6)     | 27% (9)     | 28% (16)    | 21% (6)           |               | 25.95% (41/158) |
| Aggravation        | 19% (3)              | 28% (5)     | 13% (4)     | 29% (16)    | 35% (10)          |               | 25% (38/152)    |
| mRS score          |                      |             |             |             |                   |               |                 |
| 0/1/2              | 72% (13)             | 52% (11)    | 58% (19)    | 28% (15)    | 19% (5)           |               | 41.72% (63/151) |
| 3/4/5/6            | 28% (5)              | 48% (10)    | 42% (14)    | 72% (38)    | 72% (21)          |               | 58.28% (88/151) |
| Mean mRS score     | 1.89                 | 2.33        | 2.33        | 3.49        | 4.12              | 2.99 (0–6)    | 151             |
| Death              | 6% (1)               | 5% (1)      | 9% (3)      | 26% (14)    | 35% (9)           |               | 18.54% (28/151) |
| ASPECTS            |                      |             |             |             |                   |               |                 |
| mRS 0/1/2          | 6.31                 | 5.91        | 6           | 6.8         | 7.4               |               |                 |
| Protocol deviation |                      |             |             |             |                   |               |                 |
| ASPECTS <5         | 11% (2)              | 23% (5)     | 20% (7)     | 20% (11)    | 4% (1)            |               | 16% (26/159)    |
| NIHSS <8           | 0                    | 4% (1)      | 3% (1)      | 0           | 3% (1)            |               | 2% (3/165)      |

**Note:**—ICA-T indicates intracranial carotid bifurcation; BBBD, blood-brain barrier disruption; MIP, proximal MI; MID, distal MI.
